# Supplementary material for: Unplanned Return to the Operating Room after Elective Oncologic Thoracic Surgery: A Further Quality Indicator in Surgical Oncology
Source: MDPI journal article supplement (doi:10.3390/cancers14092064), 2022-04-20
Supplement: s1 [file s1]

**Table S1.** Patients comorbidities at first surgery by reoperation during the same admission, N (column %).

| Characteristic                  |                         | Same admission |               | p-value     |
|---------------------------------|-------------------------|----------------|---------------|-------------|
|                                 |                         | No<br>N = 17   | Yes<br>N = 54 |             |
| Myocardial infarction           |                         | 1 (5.9)        | 3 (5.6)       | 1.00        |
| Peripheral vascular disease     |                         | 1 (5.9)        | 1 (1.9)       | 0.42        |
| Cerebrovascular accident or TIA |                         | 0              | 2 (3.7)       | 1.00        |
| COPD                            |                         | 2 (11.8)       | 0             | 0.05        |
| Connective tissue disease       |                         | 3 (17.7)       | 1 (1.9)       | <b>0.04</b> |
| Liver disease (Mild)            |                         | 1 (5.9)        | 2 (3.7)       | 0.57        |
| Chronic kidney disease          |                         | 0              | 1 (1.9)       | 1.00        |
| Diabetes                        | None or diet controlled | 15 (88.2)      | 48 (88.9)     | 1.00        |
|                                 | Uncomplicated           | 2 (1.8)        | 6 (11.1)      |             |
| Solid tumor                     | Localized               | 15 (88.2)      | 47 (87.0)     | 1.00        |
|                                 | Metastatic              | 2 (11.8)       | 7 (13.0)      |             |

**Table S2.** Patients comorbidities at first surgery by complication, N (column %).

| Characteristic                  |                         | Complication |               | p-value |
|---------------------------------|-------------------------|--------------|---------------|---------|
|                                 |                         | No<br>N = 39 | Yes<br>N = 32 |         |
| Myocardial infarction           |                         | 3<br>(7.7)   | 1 (3.1)       | 0.62    |
| Peripheral vascular disease     |                         | 1 (2.6)      | 1 (3.1)       | 1.00    |
| Cerebrovascular accident or TIA |                         | 1 (2.6)      | 1 (3.1)       | 1.00    |
| COPD                            |                         | 1 (2.6)      | 1 (3.1)       | 1.00    |
| Connective tissue disease       |                         | 2 (5.1)      | 2 (6.3)       | 1.00    |
| Liver disease (Mild)            |                         | 2 (5.1)      | 1 (3.1)       | 1.00    |
| Chronic kidney disease          |                         | 0            | 1 (3.1)       | 0.45    |
| Diabetes                        | None or diet controlled | 35 (89.7)    | 28 (87.5)     | 1.00    |
|                                 | Uncomplicated           | 4<br>(10.3)  | 4<br>(12.5)   |         |
| Solid tumor                     | Localized               | 32 (82.1)    | 30 (93.8)     | 0.17    |
|                                 | Metastatic              | 7<br>(17.9)  | 2<br>(6.2)    |         |
